# Supplementary material
Source: HighWire-hosted journal article supplement (https://srh.bmj.com/content/bmjsrh-2019-200487)
Supplement: inline-supplementary-material-1 [file inline-supplementary-material-1.pdf]

## Appendix 1. Joanna Briggs Institute risk of bias quality assessment for quantitative and qualitative studies

| Study                  | Q1 <sup>a</sup> | Q2 | Q3 | Q4 | Q5 | Q6 | Q7 | Q8 | Q9 | Q10 | % Yes | Risk |
|------------------------|-----------------|----|----|----|----|----|----|----|----|-----|-------|------|
| Agostino et al (23)    | Y               | Y  | Y  | Y  | N  | N  | N  | Y  |    |     | 75    | Low  |
| Akin <i>et al</i> (12) | Y               | Y  | Y  | Y  | Y  | Y  | Y  | Y  | N  |     | 90    | Low  |
| Black et al(13)        | Y               | Y  | Y  | Y  | Y  | Y  | Y  | Y  | Y  |     | 100   | Low  |
| Dawson et al(14)       | Y               | Y  | Y  | Y  | Y  | Y  | N  | Y  | Y  | Y   | 90    | Low  |
| De Moel-Mandel (29)    | Y               | Y  | Y  | Y  | Y  | Y  | N  | Y  | Y  | Y   | 90    | Low  |
| Douglas et al(15)      | Y               | Y  | Y  | Y  | Y  | Y  | N  | Y  | Y  | Y   | 90    | Low  |
| Espinoza et al (8)     | Y               | Y  | Y  | Y  | Y  | Y  | N  | Y  | Y  | Y   | 90    | Low  |
| Grindlay et al (27)    | Y               | Y  | Y  | Y  | Y  | Y  | N  | Y  | Y  | Y   | 90    | Low  |
| Hwang et al (28)       | Y               | Y  | Y  | Y  | Y  | Y  | N  | Y  | Y  | Y   | 90    | Low  |

| Study                        | Q1 <sup>a</sup> | Q2 | Q3 | Q4 | Q5 | Q6 | Q7 | Q8 | Q9 | Q10 | % Yes | Risk     |
|------------------------------|-----------------|----|----|----|----|----|----|----|----|-----|-------|----------|
| Kidula et al(19)             | Y               | Y  | Y  | Y  | N  | N  | Y  | ?  |    |     | 62.5  | Moderate |
| McKee et al(20)              | Y               | Y  | Y  | Y  | ?  | ?  | ?  | Y  |    |     | 62.5  | Moderate |
| Miller et al(16)             | Y               | Y  | Y  | Y  | Y  | Y  | Y  | Y  | Y  |     | 100   | Low      |
| Newton et al(26)             | Y               | Y  | Y  | Y  | Y  | Y  | N  | Y  | Y  | Y   | 90    | Low      |
| Ngo <i>et al</i> (7)         | Y               | Y  | Y  | Y  | ?  | ?  | ?  | Y  |    |     | 62.5  | Moderate |
| Obiadullah et al (25)        | Y               | Y  | Y  | Y  | Y  | ?  | ?  | Y  |    |     | 75    | Low      |
| Purcell et al (24)           | Y               | Y  | Y  | Y  | Y  | Y  | Y  | Y  | Y  |     | 100   | Low      |
| Reiss <i>et al</i> (22)      | Y               | Y  | Y  | Y  | Y  | Y  | Y  | Y  | Y  |     | 100   | Low      |
| Reiss <i>et al</i> (23)      | Y               | Y  | Y  | Y  | Y  | Y  | Y  | Y  | Y  |     | 100   | Low      |
| Rosenblatt <i>et al</i> (17) | Y               | Y  | Y  | Y  | Y  | Y  | Y  | Y  | Y  |     | 100   | Low      |

| Study                        | Q1 <sup>a</sup> | Q2 | Q3 | Q4 | Q5 | Q6 | Q7 | Q8 | Q9 | Q10 | % Yes | Risk     |
|------------------------------|-----------------|----|----|----|----|----|----|----|----|-----|-------|----------|
| Schwartz <i>et al</i> (20)   | Y               | Y  | Y  | Y  | Y  | Y  | Y  | Y  |    |     | 100   | Low      |
| Serena (18)                  | Y               | N  | ?  | ?  | N  | ?  | ?  | ?  |    |     | 12.5  | High     |
| Swenson <i>et al</i> (21)    | Y               | Y  | Y  | Y  | N  | ?  | Y  | ?  |    |     | 62.5  | Moderate |
| Yanikkerem <i>et al</i> (24) | Y               | Y  | Y  | Y  | Y  | Y  | Y  | Y  |    |     | 100   | Low      |

Abbreviations: Y, yes, N, no, ?, unsure. <sup>a</sup>Q1–Q10 indicate questions 1 to 10 based on the risk assessment tools for quantitative and qualitative studies. <sup>b</sup>The risk of bias was ranked as high when the study reached up to 49% of “yes” scores, moderate when the study reached between 50 and 69% of “yes” scores and low if studies reached more than 70% of “yes” scores. Scores with a high risk of bias score were excluded from the review.
